# Supplementary material
Source: PubMed Central journal article supplement (PMC5494467)
Supplement: EMBJ-36-1981-s001.pdf [file EMBJ-36-1981-s001.pdf]

## Table of Content Appendix Figures

|                                                                                                                                                                         |   |
|-------------------------------------------------------------------------------------------------------------------------------------------------------------------------|---|
| <b>Appendix Figure S1.</b> Class IV da neuron axons in control and upon <i>par-1 RNAi</i> ....                                                                          | 1 |
| <b>Appendix Figure S2.</b> Bazooka is not required for dendrite pruning, and PAR-1 does not affect Sox14 expression.....                                                | 2 |
| <b>Appendix Figure S3.</b> PAR-1 knockdown leads to accumulation of microtubules containing polyglutamylated $\alpha$ -tubulin during c4da neuron dendrite pruning..... | 3 |
| <b>Appendix Figure S4.</b> Assessment of potential PAR-1 activation mechanisms.....                                                                                     | 4 |

## Herzmann\_Appendix Figure S1

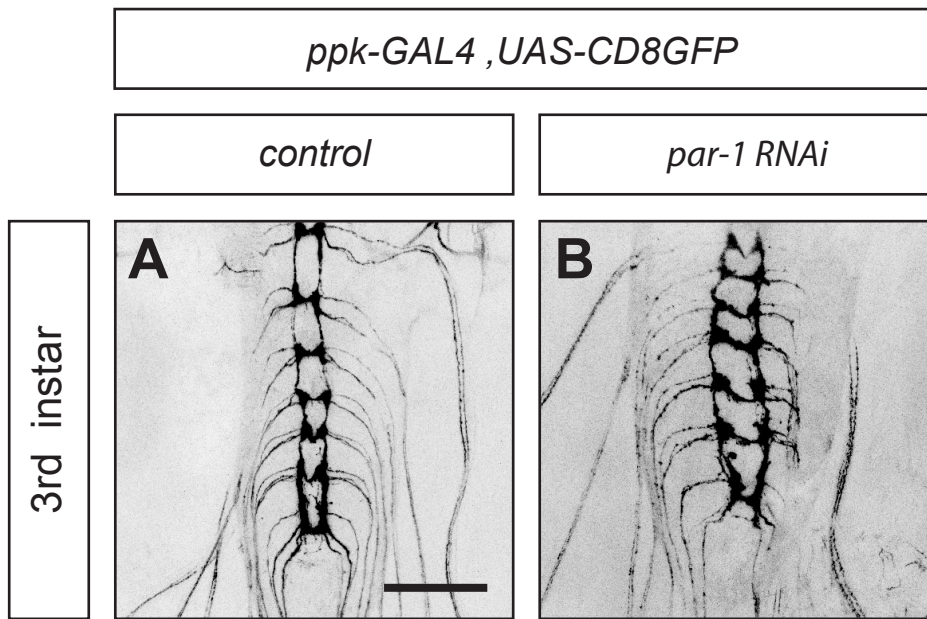

**Appendix Figure S1. Class IV da neuron axons in control and upon *par-1 RNAi*.** Axons of control (A) c4da neurons and c4da neurons expressing *par-1 RNAi* (B) were labeled by GFP under the control of *ppk-GAL4* and imaged live in third instar larvae. Scale bar, 100  $\mu\text{m}$ .

Herzmann\_Appendix Figure S2

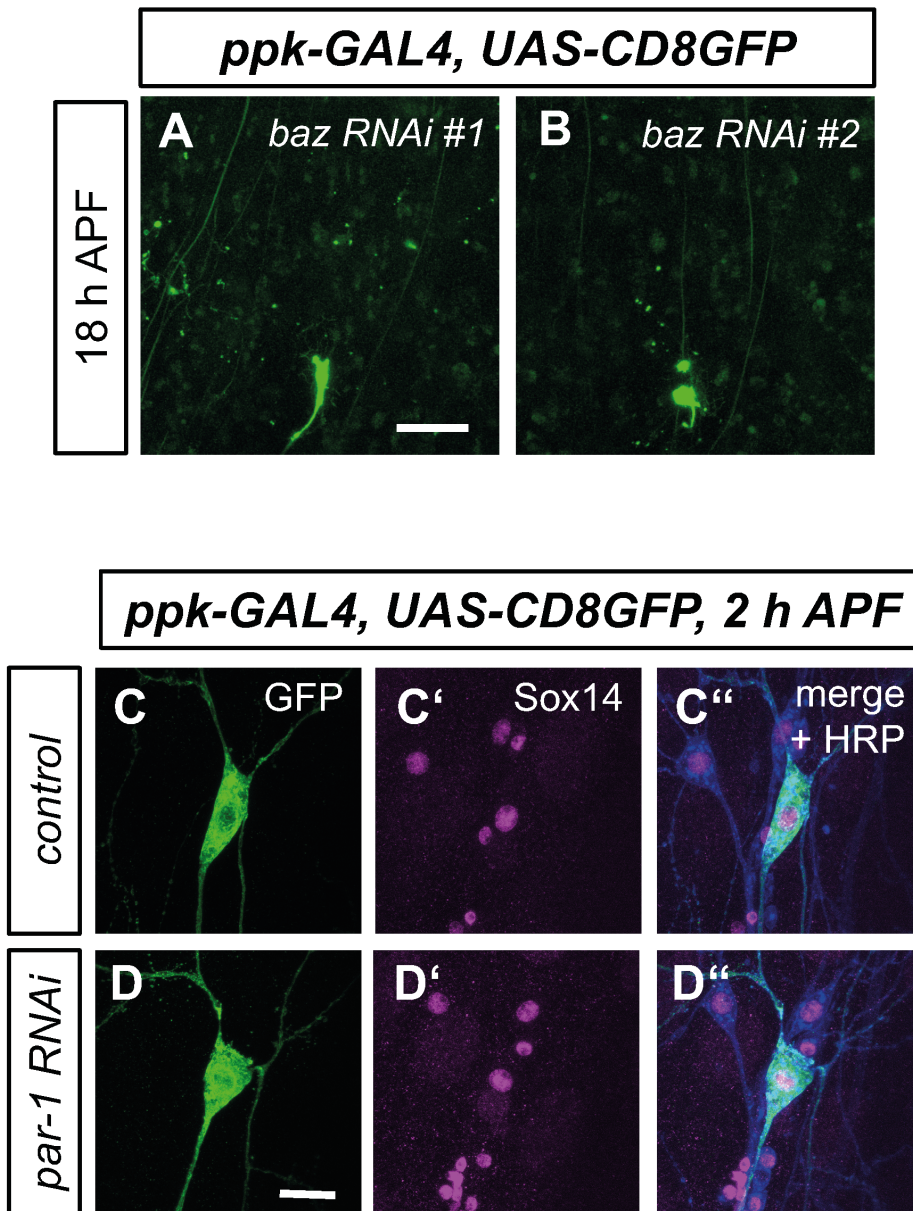

**Appendix Figure S2. Bazooka is not required for dendrite pruning, and PAR-1 does not affect Sox14 expression.** **A, B** Two different RNAi lines targeting bazooka do not affect c4da neuron dendrite pruning at 18h APF. **A** Bazooka RNAi #1 (NIG 5055R-1), 0/27 neurons with dendrites attached to the soma. **B** Bazooka RNAi #2 (VDRC 2914), 1/35 neurons with dendrites attached to the soma. **C – C''** Sox14 expression at 2 h APF in control c4da neurons. **D – D''** Sox14 expression at 2 h APF in c4da neurons expressing *par-1* RNAi.

## Herzmann\_Appendix Figure S3

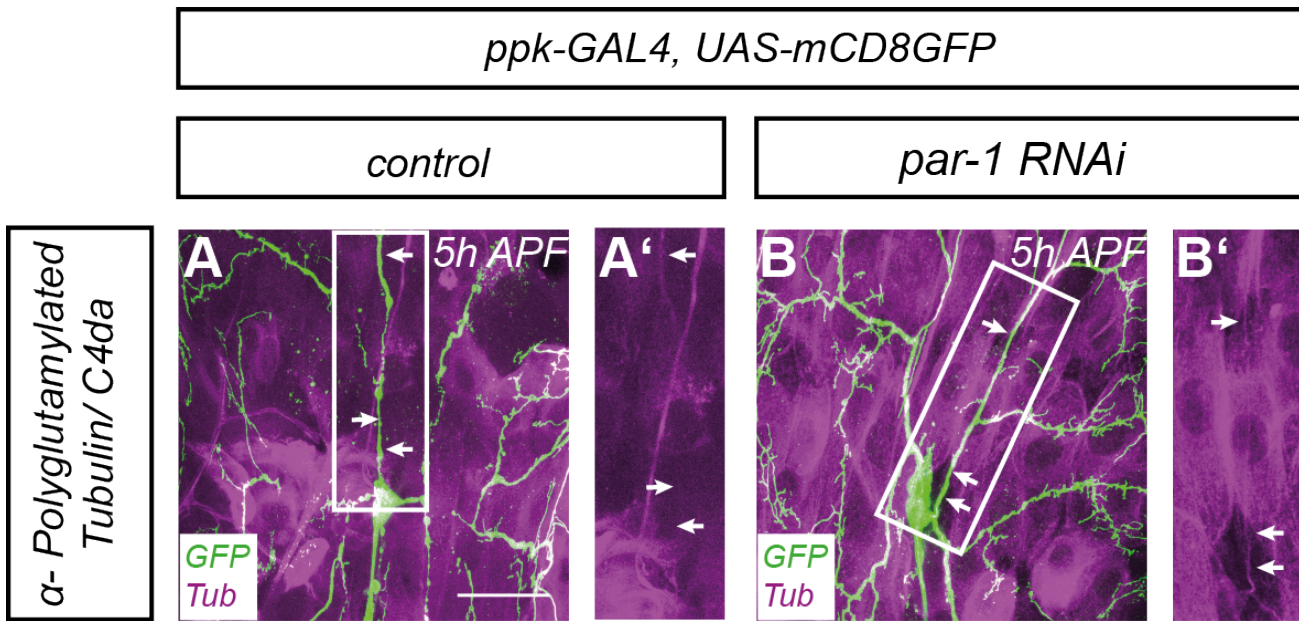

**Appendix Figure S3. PAR-1 knockdown leads to accumulation of microtubules containing polyglutamylated  $\alpha$ -tubulin during c4da neuron dendrite pruning.** C4da neuron morphology at 5 h APF was visualized by UAS-CD8GFP expressed under *ppk-GAL4*, and microtubules were labeled by an antibody against polyglutamylated  $\alpha$ -tubulin. Figures **A**, **B** show merged images of GFP expression with anti-polyglutamylated  $\alpha$ -tubulin staining. Stainings of polyglutamylated  $\alpha$ -tubulin in boxed regions are shown enlarged on the right (**A**, **B'**). The positions of c4da neuron dendrites is indicated by arrows. **A** Control c4da neuron. **B** C4da neuron expressing *par-1 RNAi*. The scale bar is 50  $\mu$ m.

## Herzmann\_Appendix Figure S4

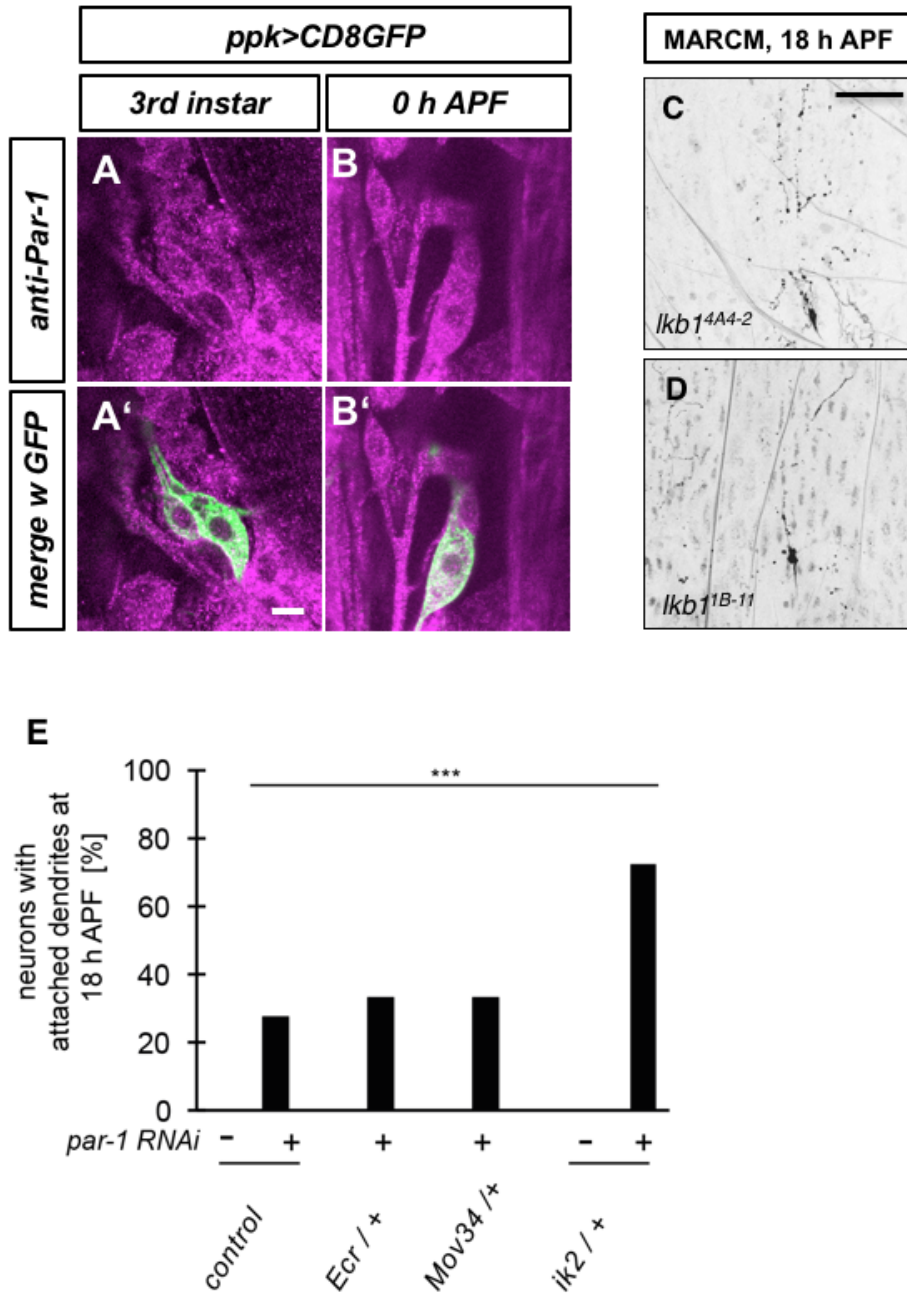

### Appendix Figure S4. Assessment of potential PAR-1 activation mechanisms.

**A, B** Expression of endogenous PAR-1 in c4da neurons at the third instar (**A**) and the white pupal stage (**B**). Lower panels **A'** and **B'** show merge with GFP expressed under *ppk*-GAL4.

**C, D** Loss of *LKB1* causes mild dendrite pruning defects. C4da neuron mutant MARCM clones of two *lkb1* alleles are shown (*lkb1*<sup>4A4-2</sup>, 23% with dendrites attached to the cell body at 18 h APF; *lkb1*<sup>1B-11</sup>, 20% with dendrites attached to the cell body at 18 h APF). **E** Heterozygosity of *ik2* (allele *ik2*<sup>alice</sup>), but not of *EcR* (*EcR*<sup>31</sup>) or the proteasome subunit *Mov34* (*mov34*<sup>k08003</sup>) enhances the pruning defect caused by *par-1* RNAi. \*\*\* P < 0.0005, Fisher's exact test.
