# Supplementary material
Source: PubMed Central journal article supplement (PMC5494467)
Supplement: EMBJ-36-1981-s002.pdf [file EMBJ-36-1981-s002.pdf]

### Expanded View Figures

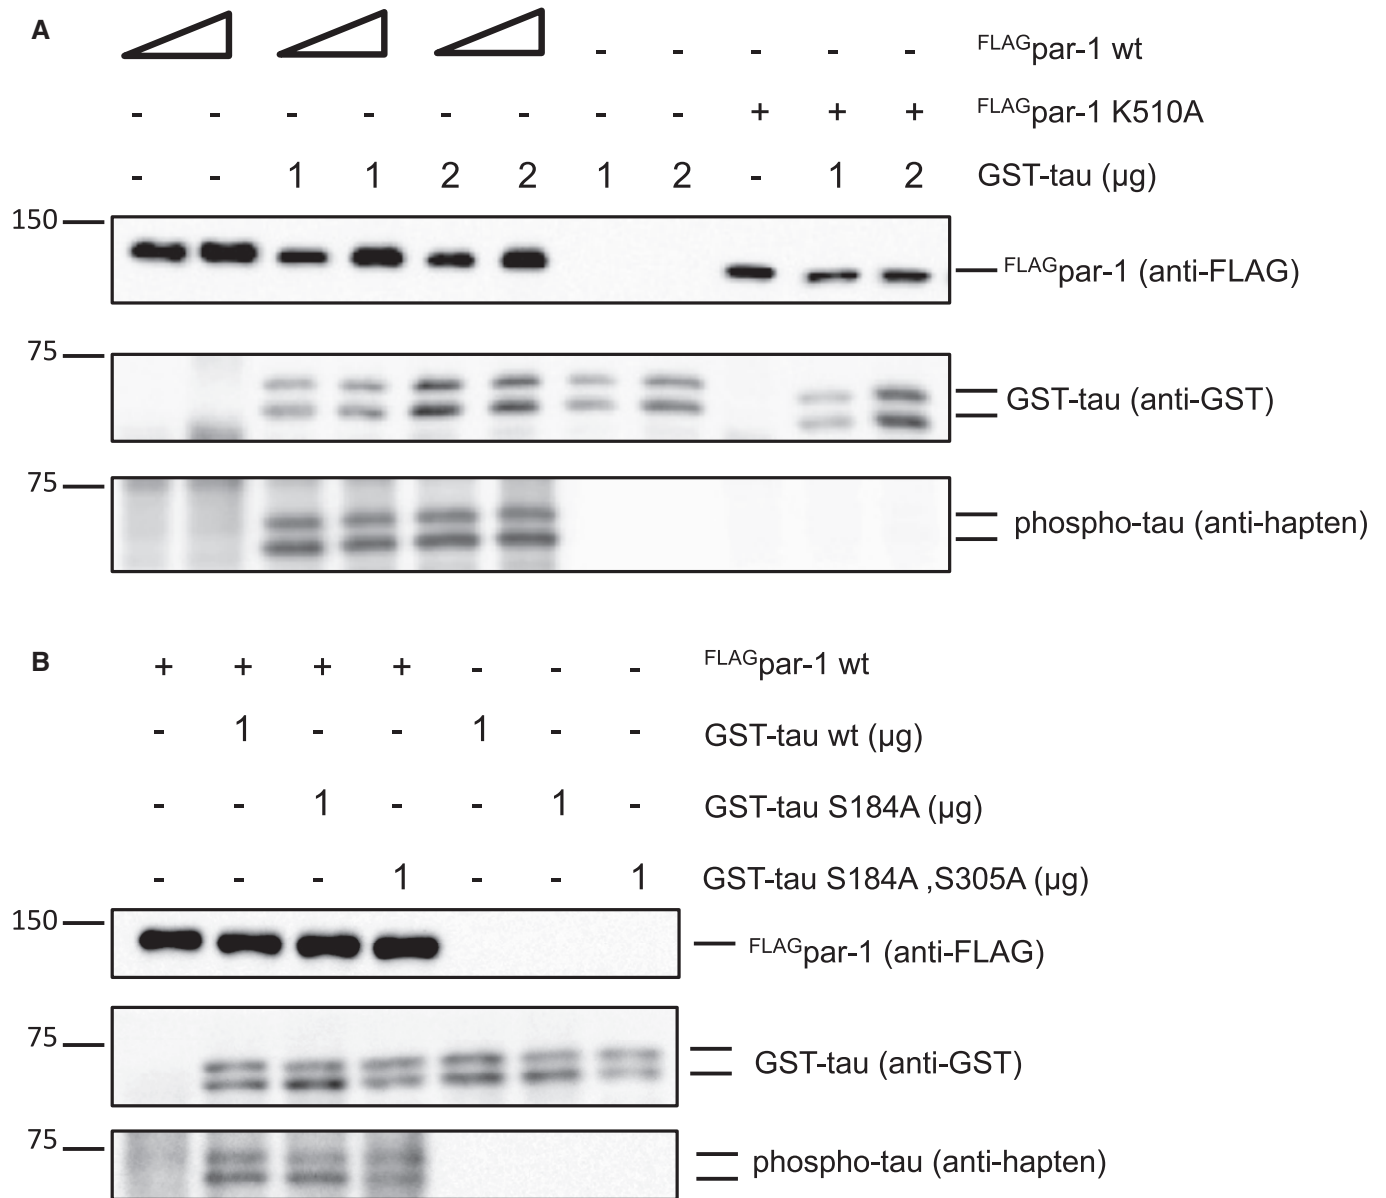

**Figure EV1. PAR-1 phosphorylates *Drosophila tau*.**

A The indicated combinations of recombinant FLAG<sub>par-1</sub> (isoform RR, wild-type, or kinase-dead K510A) from S2 cells and bacterially expressed GST-tau were incubated with ATPγS, and thiophosphorylated proteins were detected after alkylation with an antibody against a semisynthetic thiophosphate epitope (anti-hapten) (Allen et al, 2007).

B Phosphoassay with wild-type FLAG<sub>par-1</sub> and the indicated GST-tau phosphomutants.

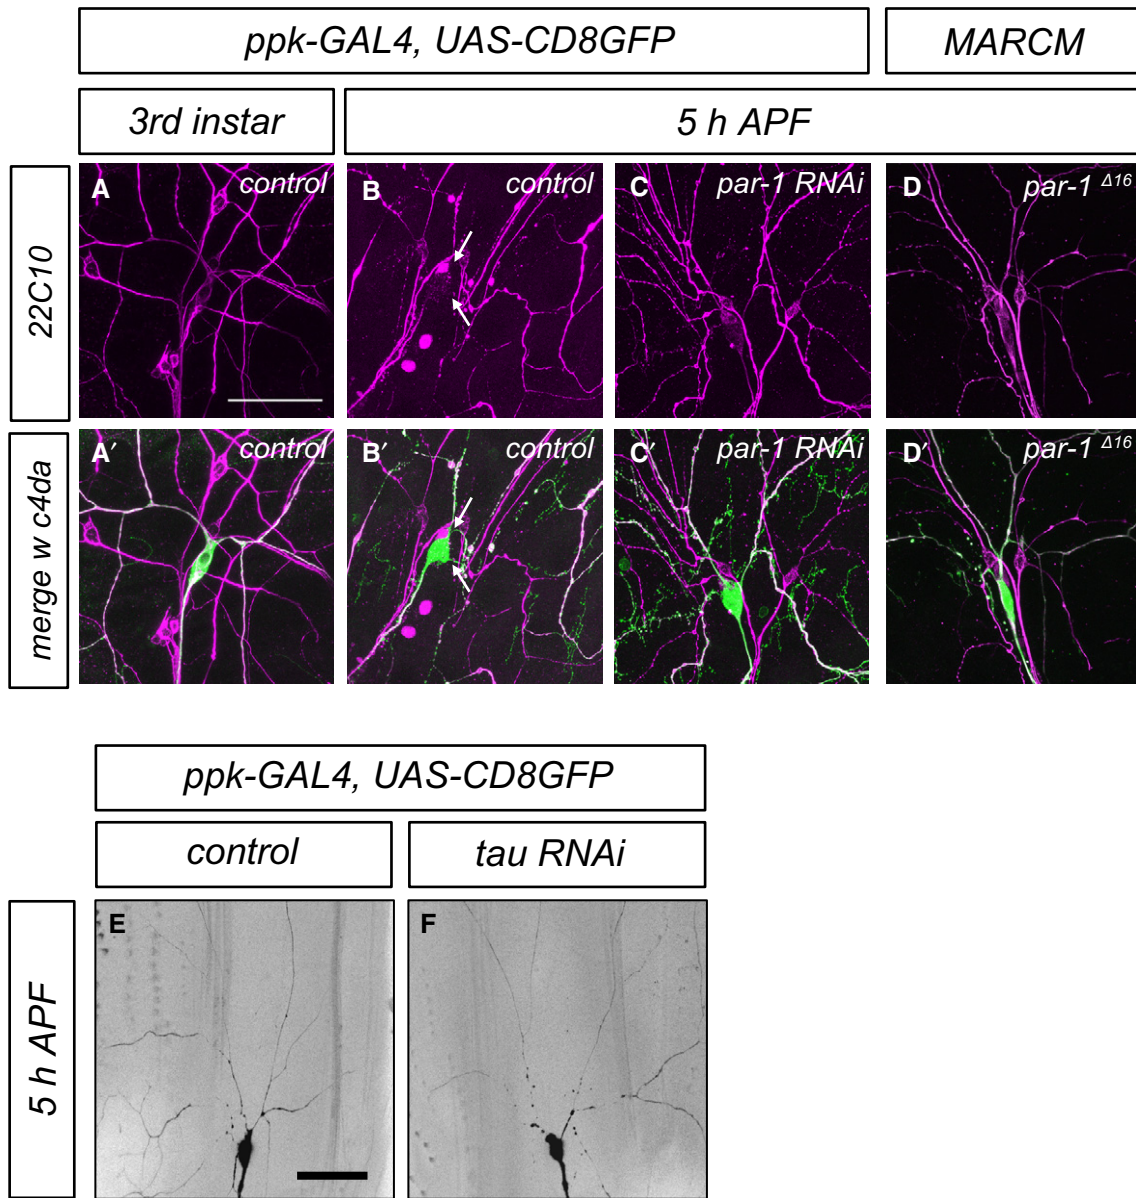

**Figure EV2. Futsch/MAP1B distribution during c4da neuron dendrite pruning and effects of tau depletion on dendrite pruning.**

A–D' Futsch/22C10 distribution in c4da neurons. Panels (A–D) show Futsch/22C10 staining, and panels (A'–D') show the merge with the c4da neuron marker (*ppk>CD8GFP* in A–C, *dtomato* in D). (A, A') Control c4da neuron at the third-instar larval stage. (B, B') Control c4da neuron at 5 h APF. Futsch/22C10 is lost from proximal dendrites (arrows). (C, C') A c4da neuron expressing *par-1 RNAi* at 5 h APF still shows strong dendritic Futsch/22C10. (D, D') A *par-1<sup>Δ16</sup>* mutant MARCM c4da neuron at 5 h APF still shows strong dendritic Futsch/22C10.

E, F *tau RNAi* does not trigger precocious dendrite pruning at 5 h APF. Representative images of control c4da neurons (E) or c4da neurons expressing *tau RNAi* under the control of *ppk-GAL4* (F) are shown.

Data information: Scale bars are 50 μm.
